# Supplementary material for: Fluorescent self-assembled nanowires of AIE fluorogens
Source: Royal Society of Chemistry journal article supplement (doi:10.1039/c4tc00788c), 2014-01-01
Supplement: c4tc00788c1.pdf [file c4tc00788c1.pdf]

## Electronic Supporting Information

### Fluorescent Self-Assembled Nanowires of AIE Fluorogens

Rongrong Hu,<sup>ab</sup> Jacky W. Y. Lam,<sup>ab</sup> Haiqin Deng,<sup>b</sup> Zhegang Song,<sup>b</sup> Chao Zheng,<sup>c</sup> and Ben Zhong Tang<sup>\*abc</sup>

<sup>a</sup> HKUST-Shenzhen Research Institute, No. 9 Yuexing 1st RD, South Area, Hi-tech Park, Nanshan, Shenzhen, China, 518057.

<sup>b</sup> Department of Chemistry, Institute for Advanced Study, Institute of Molecular Functional Materials, Division of Biomedical Engineering, Division of Life Science and State Key Laboratory of Molecular Neuroscience, The Hong Kong University of Science & Technology (HKUST), Clear Water Bay, Kowloon, Hong Kong. E-mail: tangbenz@ust.hk

<sup>c</sup> Guangdong Innovative Research Team, SCUT-HKUST Joint Research Laboratory, State Key Laboratory of Luminescent Materials and Devices, South China University of Technology (SCUT), Guangzhou 510640, China.

#### Contents

**Fig. S1** <sup>13</sup>C NMR spectra of (A)**1** and (B) **2** in chloroform-*d*.

**Fig. S2** HRMS spectrum of **1**.

**Fig. S3** HRMS spectrum of **2**.

**Fig. S4** (A) Photographs of **2** in THF/water mixtures with different water fractions ( $f_w$ ) taken under UV illumination. (B) Emission spectra of **2** in THF/water mixtures. Solution concentration: 10  $\mu$ M; excitation wavelength: 318 nm.

**Fig. S5** Photo-induced emission-enhancement of **2** in THF. Concentration: 10  $\mu$ M; excitation wavelength: 318 nm.

**Fig. S6** Change in the emission spectrum of **4** in THF solution with the UV irradiation time (0–75 min). Concentration: 10  $\mu$ M; excitation wavelength: 234 nm.

**Scheme S1.** Synthesis route to **8**.

**Fig. S7** <sup>1</sup>H NMR spectra of **7** and **8** in CDCl<sub>3</sub>.

**Fig. S8** HRMS spectrum of **8**.

**Fig. S9** UV spectrum of **8** in THF solution. Concentration: 10  $\mu$ M.

**Fig. S10** Self-assembled process of **1** in CHCl<sub>3</sub>/methanol mixed solvents with different concentrations and different  $V_{\text{CHCl}_3}/V_{\text{methanol}}$  ratios.

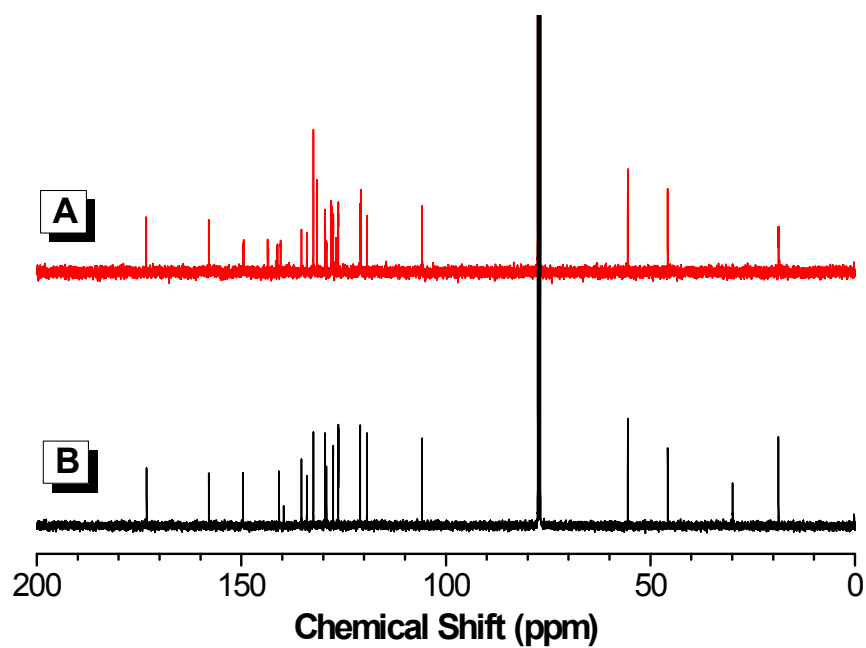

**Fig. S1**  $^{13}\text{C}$  NMR spectra of (A) **1** and (B) **2** in chloroform-*d*.

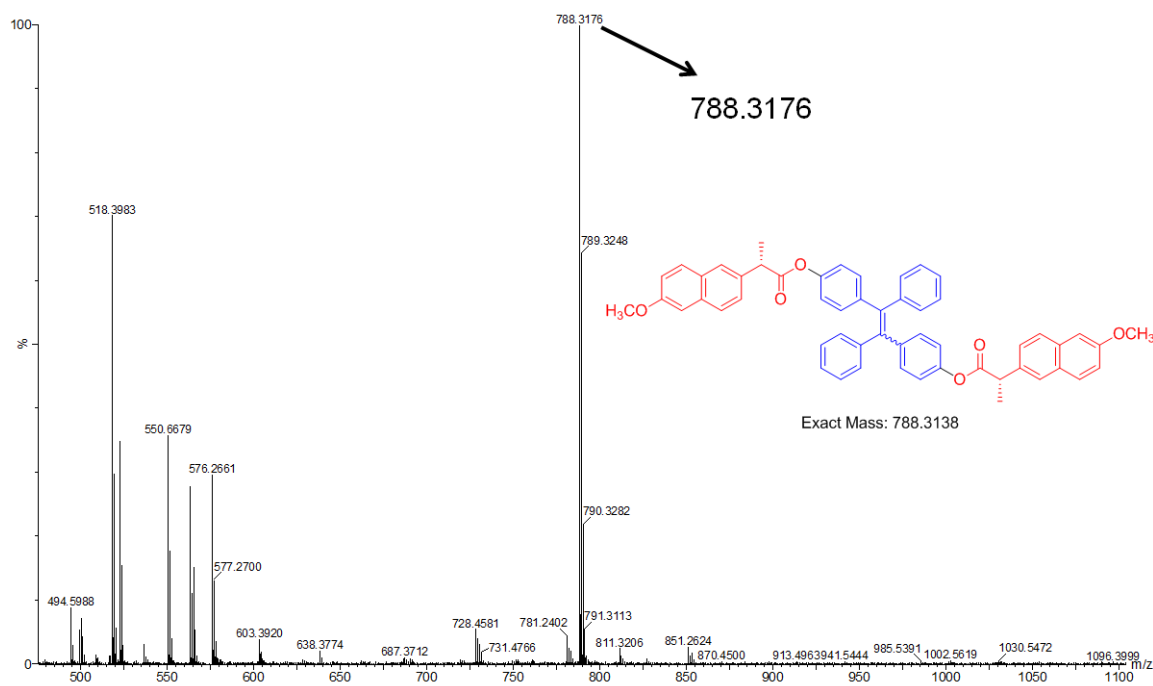

**Fig. S2** HRMS spectrum of **1**.

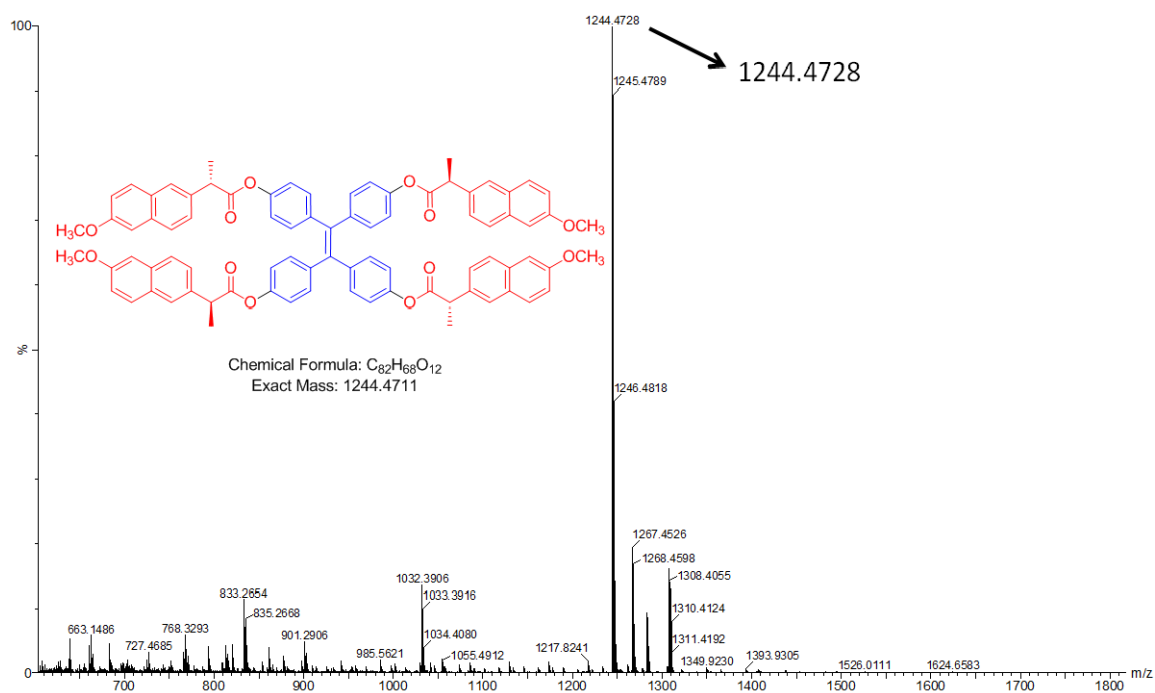

**Fig. S3** HRMS spectrum of **2**.

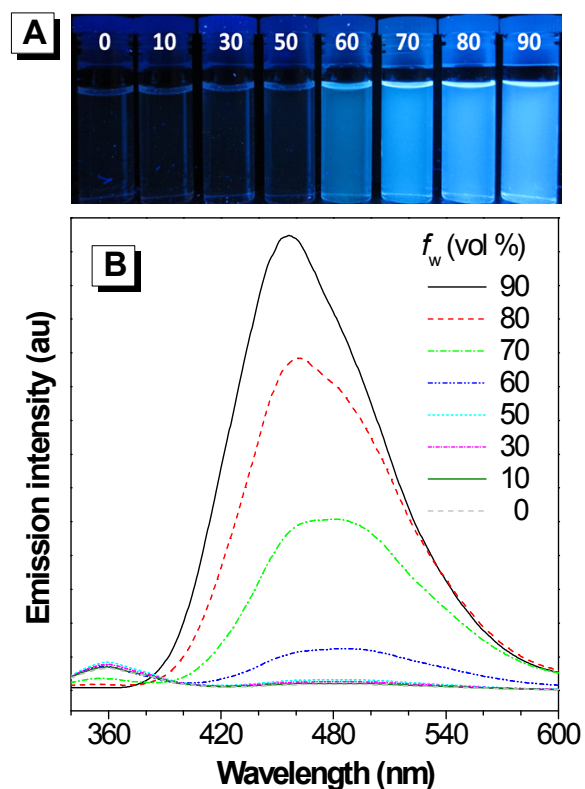

**Fig. S4** (A) Photographs of **2** in THF/water mixtures with different water fractions ( $f_w$ ) taken under UV illumination. (B) Emission spectra of **2** in THF/water mixtures. Solution concentration: 10  $\mu$ M; excitation wavelength: 318 nm.

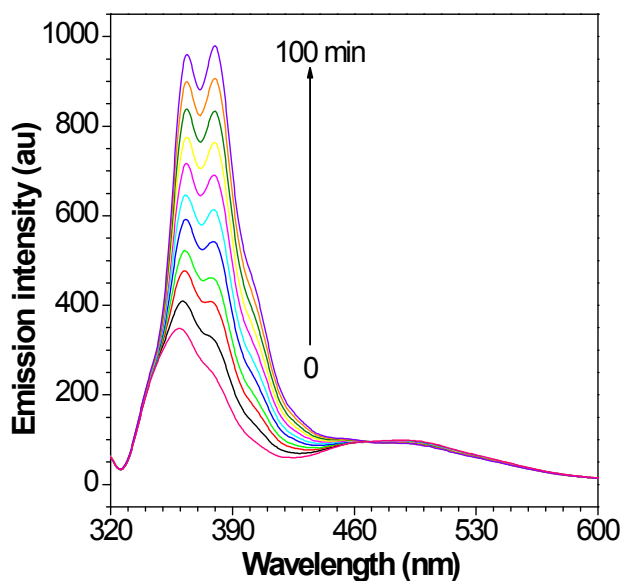

**Fig. S5** Photo-induced emission-enhancement of **2** in THF. Concentration: 10  $\mu\text{M}$ ; excitation wavelength: 318 nm.

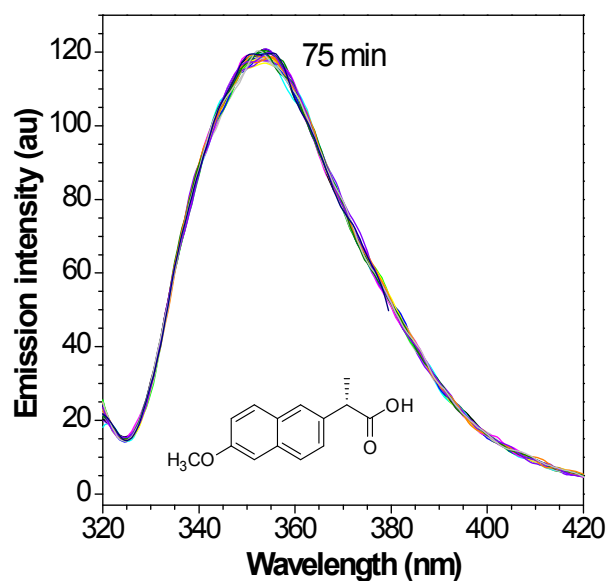

**Fig. S6** Change in the emission spectrum of **4** in THF solution with the UV irradiation time (0–75 min). Concentration: 10  $\mu\text{M}$ ; excitation wavelength: 234 nm.

**Scheme S1.** Synthesis route to **8**.

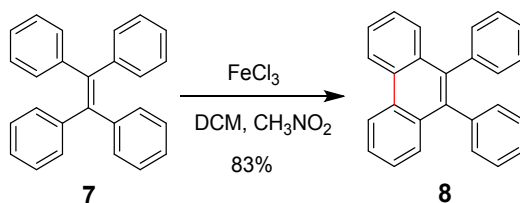

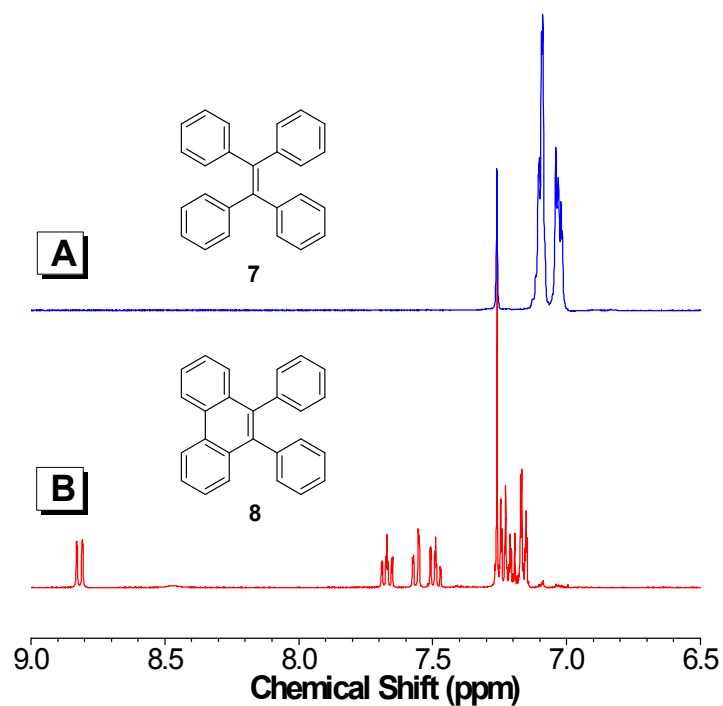

Fig. S7  $^1\text{H}$  NMR spectra of **7** and **8** in  $\text{CDCl}_3$ .

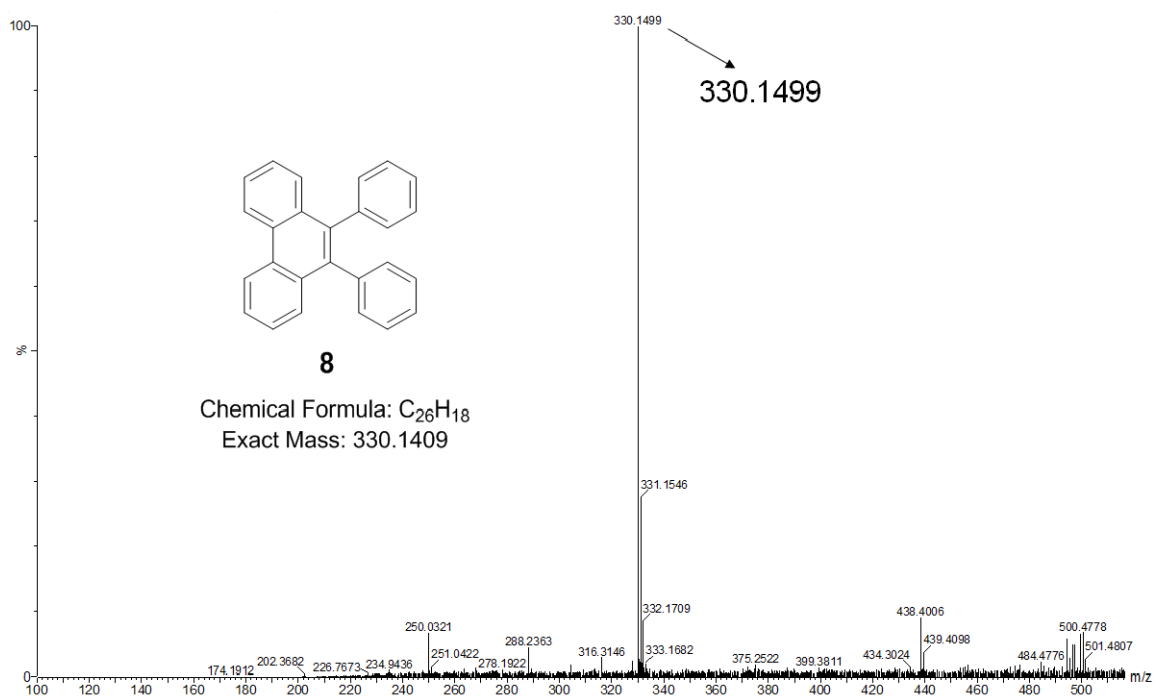

Fig. S8 HRMS spectrum of **8**.

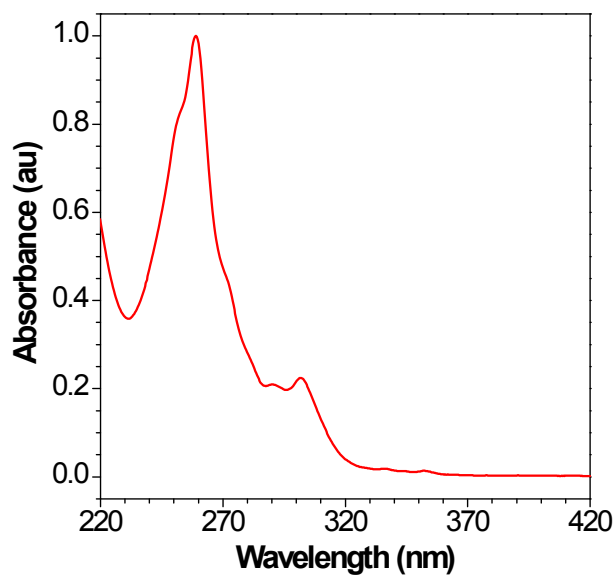

**Fig. S9** UV spectrum of **8** in THF solution. Concentration: 10  $\mu$ M.

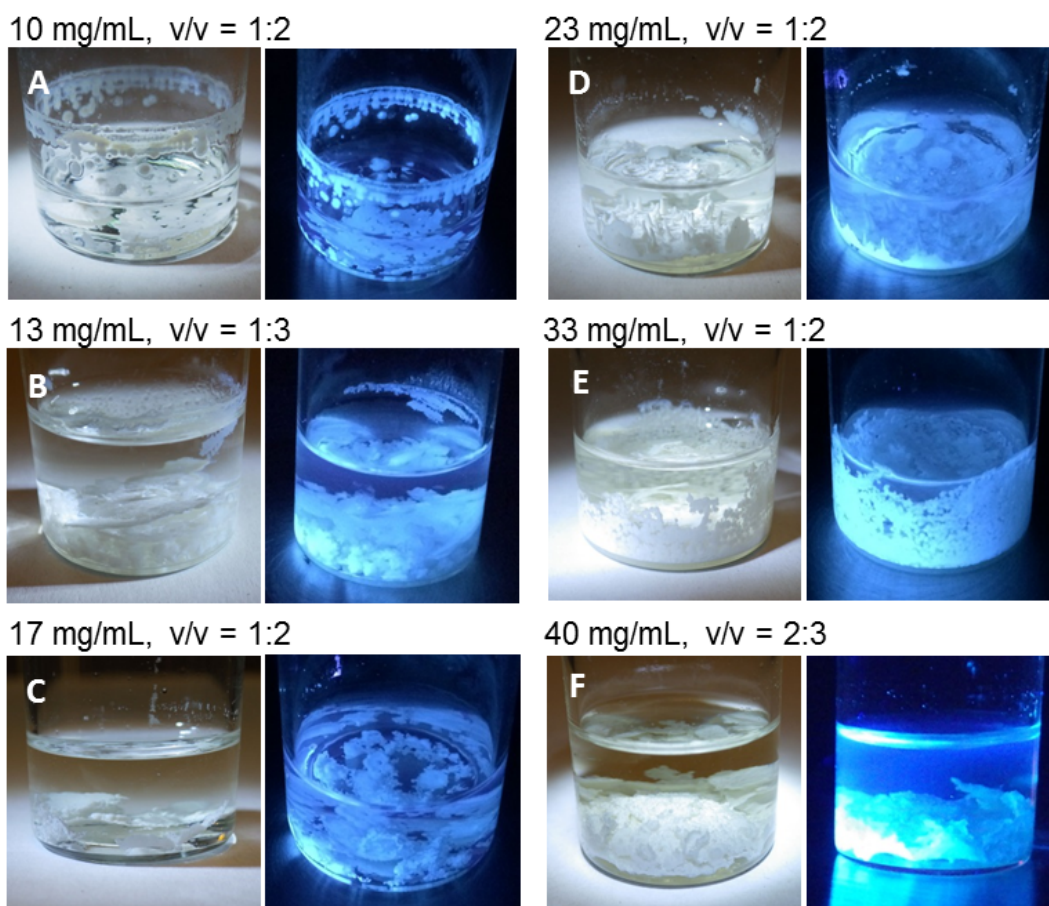

**Fig. S10** Self-assembled process of **1** in  $\text{CHCl}_3$ /methanol mixed solvents with different concentrations and different  $V_{\text{CHCl}_3}/V_{\text{methanol}}$  ratios.
